# Supplementary material
Source: Springer Nature journal article supplement (https://www.springermedizin.de/resource/supplementary/13033_2009_32_MOESM1_ESM.pdf/9651732)

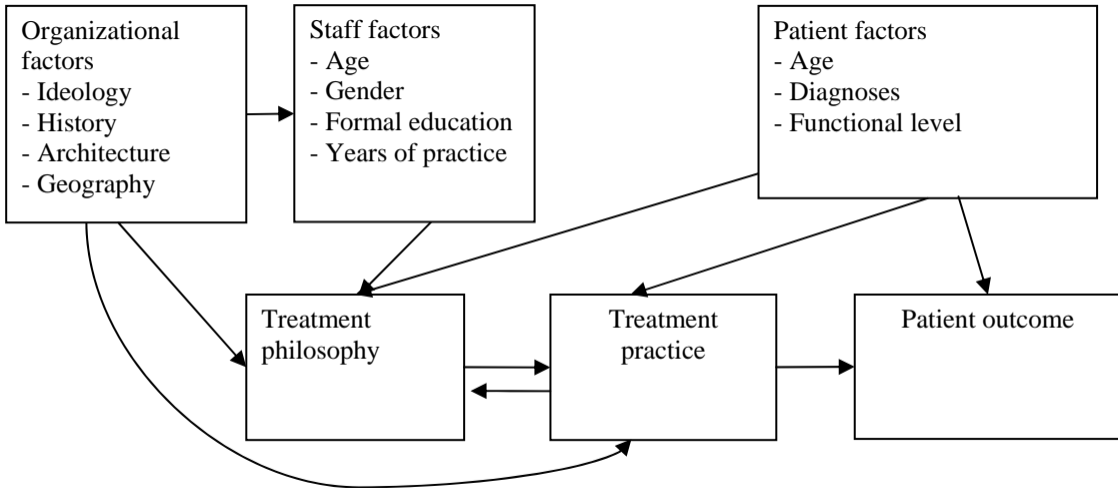

Supplement: MOESM1 [file 9651732]
